# Supplementary material for: Agonal Factors Distort Gene-Expression Patterns in Human Postmortem Brains
Source: PubMed Central journal article supplement (PMC8027124; doi:10.3389/fnins.2021.614142), 2021-03-25
Supplement: Image_1.pdf [file Image_1.pdf]

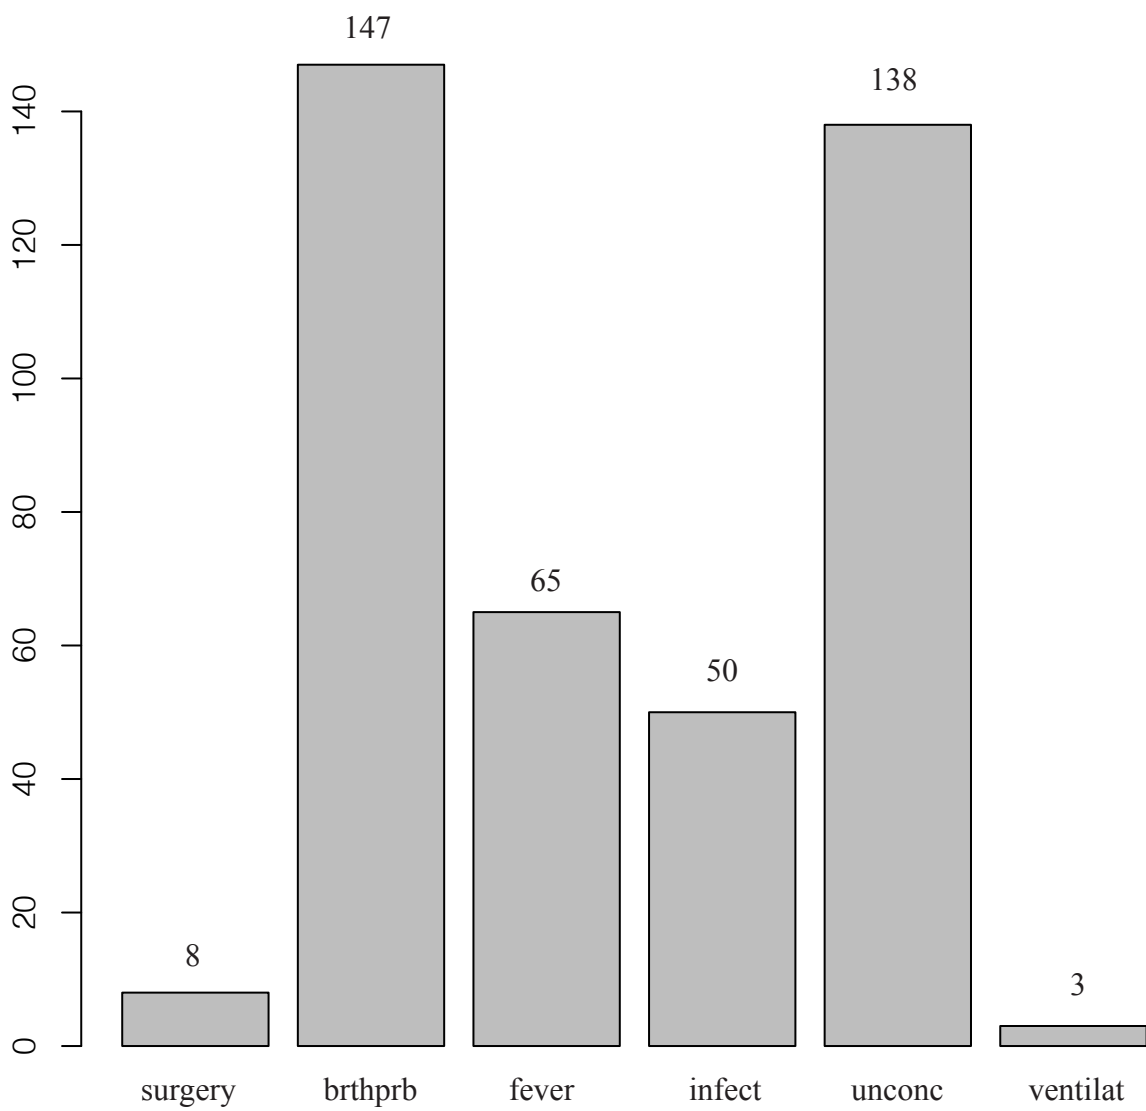

Extended figure 1. Sample size per terminal state.
